# Supplementary material
Source: publisher site journal article supplement (https://www.dovepress.com/article/335172)
Supplement: Supplementary file 1 [file get_supplementary_file.php]

**Appendix**

**Appendix Table1 List of 35 variables for frailty index**

| Number | Items | No Frailty | Frailty risk |
| --- | --- | --- | --- |
| General information | | | |
| 1 | Weight | Normal | Decline |
| 2 | Diet | Normal | Loss of appetite |
| 3 | Sleep | Normal | Abnormal |
| 4 | Stool | Normal | Diarrhea / constipation / fecal incontinence, etc |
| 5 | Urinate | Normal | Frequent urination / incontinence / poor urination |
| 6 | Spirit | Normal | Poor |
| Symptom | | | |
| 7 | Cough | No | Yes |
| 8 | Expectoration | No | Yes |
| 9 | Hemoptysis / bloody sputum | No | Yes |
| 10 | Chest tightness | No | Yes |
| 11 | Shortness of breath / dyspnea | No | Yes |
| 12 | Chest pain | No | Yes |
| 13 | Headache | No | Yes |
| 14 | Pain in other parts | No | Yes |
| 15 | Dizzy | No | Yes |
| 16 | Weakness | No | Yes |
| 17 | Fever | No | Yes |
| Sign | | | |
| 18 | Edema of both lower limbs | No | Yes |
| Past medical history | | | |
| 19 | Hypertension | No | Yes |
| 20 | Coronary heart disease | No | Yes |
| 21 | Other heart diseases | No | Yes |
| 22 | Chronic obstructive pulmonary disease | No | Yes |
| 23 | Asthma | No | Yes |
| 24 | Other lung diseases | No | Yes |
| 25 | Gastrointestinal diseases | No | Yes |
| 26 | Liver diseases | No | Yes |
| 27 | Other digestive system diseases | No | Yes |
| 28 | Diabetes | No | Yes |
| 29 | Thyroid disease | No | Yes |
| 30 | Other endocrine diseases | No | Yes |
| 31 | Kidney disease | No | Yes |
| 32 | Urinary tract diseases | No | Yes |
| 33 | Nervous system diseases | No | Yes |
| 34 | Immune system diseases | No | Yes |
| 35 | Bone and joint diseases | No | Yes |

**Appendix Table 2 Effects of per 0.1 and per 1 SD eFI on all outcomes**

| Outcome | Frailty index  (Per 0.1 increasement)  Full-adjusted model | Frailty index  (Per 1 SD increasement)†  Full-adjusted model |
| --- | --- | --- |
| All cause motility  (HR; 95%CI) | 1.18(1.06, 1.32) | 1.13(1.04, 1.22) |
| Infection  (OR; 95%CI) | 1.55(1.14, 2.10) | 1.37(1.10, 1.71) |
| Bone suppression  (OR; 95%CI) | 1.25(0.96, 1.63) | 1.17(0.97, 1.42) |
| Discontinuation  (OR; 95%CI) | 1.02(0.51, 2.04) | 1.02(0.62, 1.67) |
| Impaired liver function (OR; 95%CI) | 1.10(0.76, 1.61) | 1.07(0.82, 1.41) |
| Gastrointestinal event (OR; 95%CI) | 1.13(0.73, 1.74) | 1.09(0.80, 1.49) |
| Length of hospitalization (Days)  (Median difference; 95%CI) | 0.88(-1.28, 3.04) | 0.63(-0.85, 2.77) |

Footnote: eFI= electronic frailty index †The standard deviation of frailty index is 0.0719.

**Appendix Figure 1. Aadjusted OS normogram based on eFI**

**
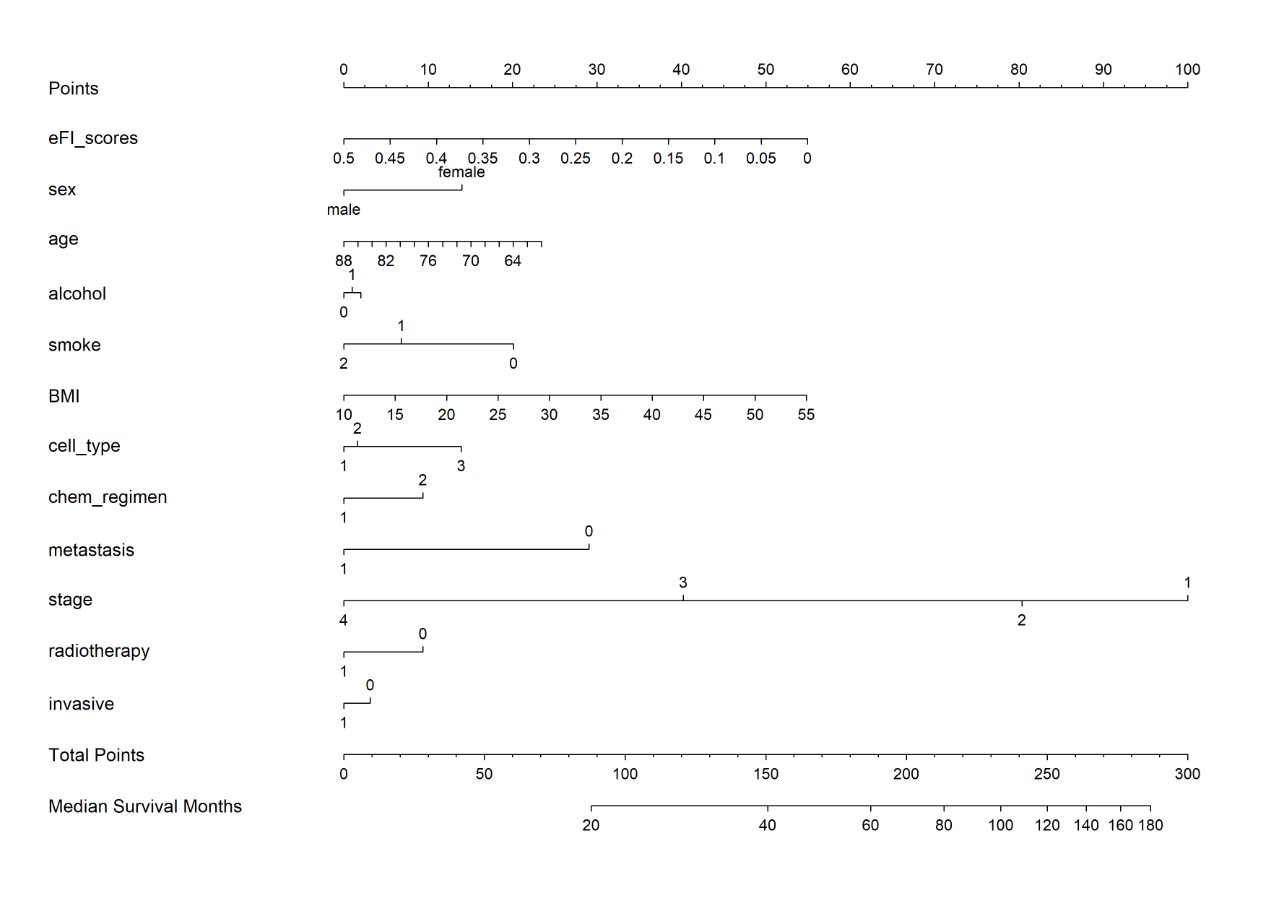
**

Footnote: OS=overall survival, eFI= electronic frailty index, alcohol (always=1, never=2, sometimes=3), Smoke (1=non-smoker, 2=former smoker, 3=current smoker=), cell-type (squamous=1, carcinoma=2, small cell carcinoma=3), chem-regimen (1=single, 2=combination), metastasis, radiotherapy, invasive examination(0=no,1=yes). clinical stage (1= I,2= II, 3= III, 4= IV).
